# Supplementary material
Source: PubMed Central journal article supplement (PMC2034168)
Supplement: bjpg57-096TableS2.pdf [file bjpg57-096TableS2.pdf]

Supplementary Table 2. Determinants of GP hours worked and hours on call per week: multiple regression estimates.

|                                                                                                 | Hours worked |                     |                                 |       | Hours on call |                    |                                 |                    |
|-------------------------------------------------------------------------------------------------|--------------|---------------------|---------------------------------|-------|---------------|--------------------|---------------------------------|--------------------|
|                                                                                                 | (1)          |                     | Additional effect of female (2) |       | (3)           |                    | Additional effect of female (4) |                    |
|                                                                                                 | coef         | t                   | coef                            | t     | coef          | t                  | coef                            | t                  |
| Part-time                                                                                       | -13.492      | -18.67 <sup>a</sup> |                                 |       | -6.375        | -6.57 <sup>a</sup> | 2.705                           | 2.19 <sup>b</sup>  |
| Female                                                                                          |              |                     | -1.834                          | -0.81 |               |                    | -3.242                          | -1.25              |
| Decades of experience                                                                           | 4.148        | 2.01 <sup>b</sup>   |                                 |       |               | -3.274             | -1.25                           |                    |
| Decades of experience squared                                                                   | -1.210       | -2.53 <sup>b</sup>  |                                 |       |               | 0.793              | 1.26                            |                    |
| Non-white                                                                                       | 0.575        | 0.67                |                                 |       | 1.888         | 1.38               | 4.602                           | 1.96 <sup>b</sup>  |
| Non-UK qualified                                                                                | 0.383        | 0.41                |                                 |       |               | 3.932              | 3.09 <sup>a</sup>               |                    |
| Partner does not work                                                                           | 3.071        | 1.60                | 1.005                           | 0.35  | -0.331        | -0.15              | 0.166                           | 0.05               |
| Partner works part-time                                                                         | 1.839        | 1.00                | -3.535                          | -1.32 | 0.646         | 0.31               | 0.205                           | 0.07               |
| Partner works full-time                                                                         | 1.719        | 0.90                | -3.165                          | -1.32 | -0.130        | -0.06              | -1.436                          | -0.53              |
| One child <18 years of age                                                                      | -2.177       | -2.23 <sup>b</sup>  | 0.360                           | 0.23  | -4.485        | -3.85 <sup>a</sup> | 2.744                           | 1.68               |
| Two children <18 years of age                                                                   | -1.867       | -2.09 <sup>b</sup>  | -1.581                          | -1.19 | -3.483        | -3.05 <sup>a</sup> | 1.037                           | 0.73               |
| Three or more children <18 years of age                                                         | -1.649       | -1.66               | -2.559                          | -1.77 | -1.667        | -1.26              | 0.794                           | 0.50               |
| Salaried                                                                                        | -1.661       | -1.42               |                                 |       | -2.192        | -1.27              |                                 |                    |
| Proportion of female GPs in practice <sup>c</sup>                                               | -0.495       | -1.68               |                                 |       | -1.727        | -3.22 <sup>a</sup> | 3.179                           | 3.96 <sup>a</sup>  |
| Practice list size ('000s) <sup>c</sup>                                                         | -0.899       | -3.74 <sup>a</sup>  |                                 |       | -3.294        | -8.17 <sup>a</sup> | 1.694                           | 2.78 <sup>a</sup>  |
| Practice list size per WTE GP ('000s) <sup>c</sup>                                              | 1.300        | 4.22 <sup>a</sup>   |                                 |       | 1.098         | 2.51 <sup>b</sup>  |                                 |                    |
| Age/sex adjustment <sup>c</sup>                                                                 | 0.684        | 2.51 <sup>b</sup>   |                                 |       | -0.150        | -0.46              |                                 |                    |
| Nursing home adjustment <sup>c</sup>                                                            | 0.627        | 2.13 <sup>b</sup>   |                                 |       | 0.105         | 0.26               | -1.331                          | -2.19 <sup>b</sup> |
| Additional needs adjustment <sup>c</sup>                                                        | -0.528       | -2.07 <sup>b</sup>  |                                 |       | -0.221        | -0.68              |                                 |                    |
| Dispensing practice                                                                             | 1.204        | 1.99 <sup>b</sup>   |                                 |       | -0.028        | -0.04              |                                 |                    |
| PMS practice                                                                                    | -0.345       | -0.68               |                                 |       | -0.040        | -0.06              |                                 |                    |
| Constant                                                                                        | 45.574       | 16.90 <sup>a</sup>  |                                 |       | 18.476        | 5.74 <sup>a</sup>  |                                 |                    |
| F-test for the joint significance of female indicator and family circumstance interaction terms |              |                     | 2.11 <sup>b</sup>               |       |               |                    | 0.68                            |                    |
| F-test for the joint significance of all female indicator interaction terms                     |              |                     | 3.62 <sup>a</sup>               |       |               |                    |                                 |                    |
| F-test for the joint significance of the excluded interaction terms                             |              |                     | 0.71                            |       |               |                    | 0.43                            |                    |
| R-squared                                                                                       |              |                     | 0.397                           |       |               |                    | 0.205                           |                    |
| n                                                                                               |              |                     | 1831                            |       |               |                    | 1752                            |                    |

When a row has entries in columns (1) and (2) the coefficient in column (1) is the effect of the variable on a male GP and the effect on a female GP is the sum of the coefficients in columns (1) and (2). When a row has a coefficient in column (1) only, the coefficient is the effect of the variable on both male and female GPs. Similarly for columns (3) and (4). <sup>a</sup>P < 0.01. <sup>b</sup>P < 0.05. <sup>c</sup>Variable divided by its standard deviation.
